# Supplementary material
Source: PubMed Central journal article supplement (PMC6604057)
Supplement: NIHMS1026538-supplement-Supplemental.pdf [file NIHMS1026538-supplement-Supplemental.pdf]

## 1 Supplemental Text:

### 2 Tibial Eminence Morphometry

3 Human tibial plateaus have an intercondylar eminence that consists of separate medial  
4 and lateral tibial spines with a bony ridge spaced between each spine. This has significant  
5 functional implications that may be a product of evolution. A study by White et al. investigated  
6 the variations in tibial plateau morphology across different primates and found features of the  
7 tibial eminence to be characteristically different among primate species based on their movement  
8 patterns. A tibial single-spine eminence or a tibial eminence with a decrease medial spine size  
9 and a decreased distance between spines were theorized to facilitate a greater degree of internal-  
10 external rotation of the proximal tibia relative to the distal femur. These features were more  
11 characteristic of vertical clinging and climbing primates who require internal-external rotation of  
12 the tibia relative to the femur for increased mobility and precise foot placement. In contrast, a  
13 double-spine eminence would act to limit knee rotation and were more indicative of primates  
14 with greater use of horizontal locomotion. Likewise, humans have double-spine eminences that,  
15 correspondingly, could have evolved to resist internal-external rotation of the knee and support  
16 horizontal locomotion. From this perspective, humans with a larger medial spine have better  
17 biomechanical function.

**18Supplemental Table 1:** Summary of injured to uninjured side comparisons made within ACL  
**19**injured subjects and within matched control subjects. Results are presented for males and  
**20**females as a combined group. Comparisons were made using paired t-tests. Within control  
**21**subject comparisons were made with the injured and uninjured sides defined to correspond to the  
**22**legs of their matched ACL-injured subject. Similar findings were obtained when considering  
**23**females and males as separate groups (Supplemental Tables 2 and 3).

24

| Variable                               | ACL Injured Subjects |                |         | Control Subjects |                |         |
|----------------------------------------|----------------------|----------------|---------|------------------|----------------|---------|
|                                        | Injured Side         | Uninjured Side | P-value | Injured Side     | Uninjured Side | P-value |
|                                        | Mean (SD)            | Mean (SD)      |         | Mean (SD)        | Mean (SD)      |         |
| M <sub>ed</sub> VOL (mm <sup>3</sup> ) | 297.3 (118.7)        | 295.8 (136.4)  | 0.89    | 330.4 (167.6)    | 325.9 (170.6)  | 0.71    |
| M <sub>ed</sub> Height (mm)            | 10.2 (1.2)           | 10.1 (1.2)     | 0.26    | 10.1 (1.4)       | 10.2 (1.5)     | 0.67    |
| M <sub>ed</sub> Width (mm)             | 17.8 (1.9)           | 17.8 (2.0)     | 1.00    | 17.7 (2.1)       | 17.8 (2.2)     | 0.67    |
| M <sub>ed</sub> Length (mm)            | 34.5 (5.1)           | 34.1 (5.5)     | 0.52    | 34.2 (5.8)       | 34.6 (6.4)     | 0.38    |
| M <sub>ed</sub> CGLoc (mm)             | 1.0 (2.1)            | 1.1 (2)        | 0.56    | 1.6 (2.3)        | 1.6 (2.3)      | 0.69    |
| L <sub>at</sub> VOL (mm <sup>3</sup> ) | 580.1 (185.7)        | 587.1 (219.8)  | 0.72    | 590.4 (205.3)    | 576.1 (209.2)  | 0.40    |
| L <sub>at</sub> Height (mm)            | 7.6 (1.2)            | 7.8 (1.3)      | 0.18    | 8.1 (1.4)        | 8.0 (1.4)      | 0.67    |
| L <sub>at</sub> Width (mm)             | 17.2 (2.3)           | 17.0 (2.3)     | 0.43    | 17.2 (2.6)       | 17.0 (2.5)     | 0.39    |
| L <sub>at</sub> Length (mm)            | 28.0 (5.5)           | 27.8 (5.5)     | 0.62    | 27.7 (5.3)       | 27.9 (5.6)     | 0.60    |
| L <sub>at</sub> CGLoc (mm)             | -5.8 (1.6)           | -5.7 (1.7)     | 0.74    | -5.7 (1.6)       | -5.6 (1.5)     | 0.92    |

25

26

**28Supplemental Table 2:** Summary of injured to uninjured side comparisons made within ACL  
 29injured and within matched control subjects with males as a separate group. Within control  
 30subject comparisons were made with the injured and uninjured sides defined to correspond to the  
 31legs of their matched ACL-injured subject. Comparisons tested using paired t-tests.  
 32

| Variable                               | Male ACL Injured Subjects |                |         | Male Control Subjects |                |         |
|----------------------------------------|---------------------------|----------------|---------|-----------------------|----------------|---------|
|                                        | Injured Side              | Uninjured Side | P-value | Injured Side          | Uninjured Side | P-value |
|                                        | Mean (SD)                 | Mean (SD)      |         | Mean (SD)             | Mean (SD)      |         |
| M <sub>ed</sub> VOL (mm <sup>3</sup> ) | 368.3 (132.5)             | 340.8 (173.6)  | 0.20    | 487.0 (189.2)         | 462.1 (202.1)  | 0.44    |
| M <sub>ed</sub> Height (mm)            | 11.0 (1.2)                | 10.7 (1.3)     | 0.24    | 11.3 (1.2)            | 11.4 (1.3)     | 0.78    |
| M <sub>ed</sub> Width (mm)             | 19.0 (2.0)                | 19.3 (1.9)     | 0.48    | 19.2 (1.9)            | 19.7 (1.8)     | 0.13    |
| M <sub>ed</sub> Length (mm)            | 37.1 (5.1)                | 37.0 (4.4)     | 0.92    | 37.7 (5.5)            | 38.4 (6.2)     | 0.32    |
| M <sub>ed</sub> CGLoc (mm)             | 1.7 (1.9)                 | 1.7 (1.8)      | 0.88    | 2.3 (2.2)             | 2.2 (2.2)      | 0.64    |
| L <sub>at</sub> VOL (mm <sup>3</sup> ) | 656.3 (226.8)             | 719.0 (251.8)  | 0.15    | 701.4 (229.2)         | 704.1 (262.7)  | 0.94    |
| L <sub>at</sub> Height (mm)            | 8.0 (1.4)                 | 8.1 (1.3)      | 0.59    | 8.8 (1.3)             | 8.8 (1.6)      | 0.93    |
| L <sub>at</sub> Width (mm)             | 19.3 (2.2)                | 18.8 (2.1)     | 0.30    | 19.3 (2.1)            | 19.1 (2.3)     | 0.58    |
| L <sub>at</sub> Length (mm)            | 28.6 (4.6)                | 29.4 (5.1)     | 0.40    | 29.9 (6.0)            | 30.6 (6.3)     | 0.46    |
| L <sub>at</sub> CGLoc (mm)             | -5.8 (1.8)                | -5.4 (1.9)     | 0.12    | -5.9 (1.4)            | -6.0 (1.1)     | 0.74    |

**35Supplemental Table 3:** Summary of injured to uninjured side comparisons made within ACL  
**36**injured and within matched control subjects with females as a separate group. Within control  
**37**subject comparisons were made with the injured and uninjured sides defined to correspond to the  
**38**legs of their matched ACL-injured subject. Comparisons tested using paired t-tests.  
**39**

| Variable                               | Female ACL Injured Subjects |                |         | Female Control Subjects |                |         |
|----------------------------------------|-----------------------------|----------------|---------|-------------------------|----------------|---------|
|                                        | Injured Side                | Uninjured Side | P-value | Injured Side            | Uninjured Side | P-value |
|                                        | Mean (SD)                   | Mean (SD)      |         | Mean (SD)               | Mean (SD)      |         |
| M <sub>ed</sub> VOL (mm <sup>3</sup> ) | 265.9 (97.7)                | 275.9 (112.3)  | 0.42    | 261.0 (96.3)            | 265.7 (111.6)  | 0.65    |
| M <sub>ed</sub> Height (mm)            | 9.8 (1.1)                   | 9.8 (1.1)      | 0.65    | 9.6 (1.2)               | 9.6 (1.2)      | 0.74    |
| M <sub>ed</sub> Width (mm)             | 17.3 (1.7)                  | 17.1 (1.6)     | 0.41    | 17.0 (1.7)              | 16.9 (1.8)     | 0.67    |
| M <sub>ed</sub> Length (mm)            | 33.3 (4.7)                  | 32.9 (5.4)     | 0.48    | 32.6 (5.3)              | 32.9 (5.7)     | 0.64    |
| M <sub>ed</sub> CGLoc (mm)             | 0.7 (2.1)                   | 0.8 (2.0)      | 0.52    | 1.3 (2.3)               | 1.3 (2.3)      | 0.86    |
| L <sub>at</sub> VOL (mm <sup>3</sup> ) | 546.3 (154.7)               | 528.8 (177.0)  | 0.41    | 541.3 (174.2)           | 519.5 (151.5)  | 0.23    |
| L <sub>at</sub> Height (mm)            | 7.5 (1.0)                   | 7.6 (1.2)      | 0.21    | 7.8 (1.3)               | 7.7 (1.2)      | 0.58    |
| L <sub>at</sub> Width (mm)             | 16.3 (1.7)                  | 16.2 (2.0)     | 0.85    | 16.2 (2.1)              | 16.0 (2.0)     | 0.52    |
| L <sub>at</sub> Length (mm)            | 27.7 (5.9)                  | 27.1 (5.5)     | 0.22    | 26.7 (4.7)              | 26.8 (4.9)     | 0.91    |
| L <sub>at</sub> CGLoc (mm)             | -5.8 (1.6)                  | -5.9 (1.6)     | 0.57    | -5.6 (1.7)              | -5.5 (1.6)     | 0.75    |

40

41

**42Supplemental Table 4:** Univariate associations between tibial spine measurements and risk of  
**43**suffering an ACL injury. Odds ratio and 95% confidence interval (CI) obtained from conditional  
**44**logistic regression using the injured leg of ACL injured subjects and corresponding leg of  
**45**control. Females and males analyzed as both separate and combined groups. (Note: M<sub>ed</sub>Vol and  
**46**L<sub>at</sub>Vol odds ratios correspond to the effect of a 100 mm<sup>3</sup> increase and the odds ratios for the other  
**47**variables correspond to a 1 mm change.)

48

| Variable<br>(Unit Change)                     | Female subjects        |         | Male subjects                        |             | Males and Females<br>combined         |             |
|-----------------------------------------------|------------------------|---------|--------------------------------------|-------------|---------------------------------------|-------------|
|                                               | Odds Ratio<br>(95% CI) | P-value | Odds Ratio<br>(95% CI)               | P-value     | Odds Ratio<br>(95% CI)                | P-value     |
| M <sub>ed</sub> VOL<br>(100 mm <sup>3</sup> ) | 1.05<br>(0.74 - 1.49)  | 0.79    | <b>0.55</b><br>( <b>0.33 - 0.9</b> ) | <b>0.02</b> | 0.80<br>(0.62 - 1.03)                 | 0.08        |
| M <sub>ed</sub> Height<br>(1 mm)              | 1.23<br>(0.88 - 1.72)  | 0.22    | 0.72<br>(0.43 - 1.22)                | 0.22        | 1.04<br>(0.8 - 1.37)                  | 0.75        |
| M <sub>ed</sub> Width<br>(1 mm)               | 1.17<br>(0.89 - 1.53)  | 0.26    | 0.94<br>(0.73 - 1.22)                | 0.66        | 1.04<br>(0.87 - 1.25)                 | 0.64        |
| M <sub>ed</sub> Length<br>(1 mm)              | 1.03<br>(0.96 - 1.1)   | 0.45    | 0.96<br>(0.84 - 1.11)                | 0.60        | 1.01<br>(0.95 - 1.08)                 | 0.66        |
| M <sub>ed</sub> CGLoc<br>(1 mm)               | 0.87<br>(0.73 - 1.03)  | 0.11    | 0.81<br>(0.59 - 1.12)                | 0.20        | <b>0.85</b><br>( <b>0.74 - 0.99</b> ) | <b>0.04</b> |
| L <sub>at</sub> VOL<br>(100 mm <sup>3</sup> ) | 1.02<br>(0.8 - 1.3)    | 0.85    | 0.88<br>(0.66 - 1.18)                | 0.40        | 0.96<br>(0.8 - 1.15)                  | 0.67        |
| L <sub>at</sub> Height<br>(1 mm)              | 0.82<br>(0.61 - 1.11)  | 0.19    | 0.64<br>(0.39 - 1.07)                | 0.09        | <b>0.76</b><br>( <b>0.59 - 0.98</b> ) | <b>0.03</b> |
| L <sub>at</sub> Width<br>(1 mm)               | 1.02<br>(0.84 - 1.23)  | 0.85    | 0.98<br>(0.74 - 1.29)                | 0.89        | 1.01<br>(0.86 - 1.17)                 | 0.94        |
| L <sub>at</sub> Length<br>(1 mm)              | 1.04<br>(0.97 - 1.12)  | 0.28    | 0.93<br>(0.81 - 1.07)                | 0.30        | 1.01<br>(0.95 - 1.08)                 | 0.66        |
| L <sub>at</sub> CGLoc<br>(1 mm)               | 0.9<br>(0.71 - 1.15)   | 0.40    | 1.07<br>(0.74 - 1.55)                | 0.70        | 0.95<br>(0.78 - 1.16)                 | 0.61        |

49

50
